2 Detecting Flavobacterial Fish Pathogens in the Environment Using High-Throughput  
3 Community Analysis

4

5 Todd Testerman<sup>1</sup>, Lidia Beka<sup>1\*</sup>, Emily Ann McClure<sup>1†</sup>, Stephen R. Reichley<sup>2‡</sup>, Stacy  
6 King<sup>2</sup>, Timothy J. Welch<sup>3</sup>, and Joerg Graf<sup>1#</sup>

7

8 <sup>1</sup>University of Connecticut, Department of Molecular and Cell Biology, Storrs,  
9 Connecticut, 06269, USA

10 <sup>2</sup>Riverence Provisions, Buhl, Idaho, USA

11 <sup>3</sup>National Center for Cool and Cold Water Aquaculture, Agricultural Research  
12 Service/U.S. Department of Agriculture, Kearneysville, West Virginia, USA.

13

14

15 Keywords: aquaculture, pathogen, detection, metagenomics

16

17 #Corresponding author: Joerg Graf, University of Connecticut, Department of Molecular  
18 and Cell Biology, Storrs, Connecticut 06269, USA, [joerg.graf@uconn.edu](mailto:joerg.graf@uconn.edu), Phone: 860-  
19 486-9284

20

21 \*Current address: Independent Researcher, Glastonbury, CT, USA

22 †Current address: Geisel School of Medicine, Dartmouth College, Lebanon, NH, USA

23 ‡Current address: College of Veterinary Medicine, Mississippi State University,  
24 Starkville, MS, USA

25

26

27

28

29

30

31

32

## 33 **Abstract**

34 Diseases caused by the fish pathogens *Flavobacterium columnare* and *Flavobacterium*  
35 *psychrophilum* are major contributors of preventable losses in the aquaculture industry.  
36 The persistent and difficult to control infections caused by these bacteria make timely  
37 intervention and prophylactic elimination of pathogen reservoirs important measures to  
38 combat these disease-causing agents. In the present study, we present two  
39 independent assays for detecting these pathogens in a range of environmental  
40 samples. Natural water samples were inoculated with *F. columnare* and *F.*  
41 *psychrophilum* cells, and pathogen levels were detected using Illumina MiSeq  
42 sequencing and droplet digital PCR. Both detection methods accurately identified  
43 pathogen-positive samples and showed good agreement in quantifying each pathogen.  
44 Additionally, the real-world application of these approaches was demonstrated using  
45 environmental samples collected at a rainbow trout aquaculture facility. These results  
46 show that both methods can serve as useful tools for surveillance efforts in aquaculture  
47 facilities, where the early detection of these flavobacterial pathogens may direct  
48 preventative measures to reduce disease occurrence.

## 49 **Importance**

50 Early detection of a deadly disease outbreak in a population can be the difference  
51 between mass fatality or mitigated effects. In the present study, we evaluated and  
52 compared two techniques for detecting economically impactful aquaculture pathogens.  
53 We demonstrate that one of these techniques, 16S rRNA gene sequencing using  
54 Illumina MiSeq technology, provides the ability to accurately detect two fish pathogens,  
55 *F. columnare* and *F. psychrophilum*, while simultaneously profiling the native microbial

56 community. The second technique, droplet digital PCR, is commonly used for pathogen  
57 detection, and the results obtained using the assays we designed with this method  
58 served to validate those obtained using the MiSeq method. These two methods offer  
59 distinct advantages. The MiSeq method pairs pathogen detection and microbial  
60 community profiling to answer immediate and long-term fish health concerns, while  
61 droplet digital PCR method provides fast and highly sensitive detection that is useful for  
62 surveillance and rapid clinical responses.

63

## 64 **Introduction**

65 Improving detection methods for bacterial pathogens is a top priority in the global  
66 aquaculture industry, as delayed detection and identification of a pathogen can lead to  
67 devastating disease outbreaks and high production losses (1). *Flavobacterium*  
68 *columnare* and *Flavobacterium psychrophilum*, the causative agents of columnaris and  
69 bacterial cold-water disease (BCWD), respectively, are important threats to the fish  
70 farming industry (2). Once introduced into a fish-rearing facility, these pathogens have  
71 the potential to rapidly spread and establish biofilms, allowing them to escape biocidal  
72 treatments (3, 4). Due to their speed of transmission and long-term survival on surfaces,  
73 *F. columnare* and *F. psychrophilum* are immensely difficult to control in fish farms (5, 6)  
74 and thus have contributed to major economic losses (7).

75         Although considerable efforts have been made to control infections caused by  
76 flavobacteria over the last fifty years, rainbow trout production losses caused by these  
77 pathogens remain high. Studies point to the ability of *Flavobacterium* spp. to survive in a  
78 variety of environments, including aquatic and fish-host associated biomes (5, 6).

79 Biofilm formation and the rapid acquisition of antibiotic resistance genes reduce the  
80 efficacy of antibiotic therapies for trout. Antibiotics are often ineffective at eliminating  
81 pathogens in rearing-facilities and increase the potential for the development of drug-  
82 resistant *Flavobacterium* species (8, 9). Genome rearrangement and mutation can also  
83 lead to antigen variation in the fish host, reducing the efficacy of new vaccines,  
84 potentially explaining why studies report a low reproducibility of results (9–11). The  
85 potential of *Flavobacterium* pathogens to linger in fish farms necessitates improved  
86 detection methods that allow for early detection and provide insights into potential  
87 reservoirs in aquaculture facilities.

88         Current *F. columnare* and *F. psychrophilum* identification methods range widely  
89 depending on the need and capabilities of the laboratory performing the identification  
90 (12) and include classical biochemical (13), antigen-based, PCR-based, and DNA array-  
91 based techniques (14). The detection of *F. columnare* and *F. psychrophilum* in water  
92 and surface samples is further complicated by the presence of multitudinous non-  
93 pathogenic *Flavobacterium* species. These environments also commonly contain PCR  
94 inhibitors that can reduce the reliability of PCR-based assays (15). Furthermore, *F.*  
95 *psychrophilum* can also be challenging to identify through culture-based approaches  
96 because of its slow growth rate and overgrowth by other bacteria (16). These growth  
97 characteristics of flavobacteria present a challenge for timely identification, and  
98 alternative identification methods are needed.

99         At aquaculture facilities, similar to natural settings, many areas can harbor  
100 pathogens and warrant careful sampling for pathogen detection. For example, after  
101 entering a facility with the incoming water, bacterial pathogens can colonize and form

102 biofilms on various surfaces, including the fish raceway walls, containment screens, or  
103 baffles (structures commonly used to direct the flow of water downward within  
104 raceways). Bacteria in biofilms are more resistant to common biocidal treatment  
105 methods, which is a serious problem (17). If the pathogens attach to the surfaces of  
106 water pipes or other system components, they can escape disinfection or cleaning  
107 attempts and potentially serve as sources of disease recurrence. Many of these issues  
108 are of particular concern for flow-through facilities that use untreated spring, ground, or  
109 river water. Thus, this specific type of farm could benefit from surveillance at the water  
110 inflow. However, even with strategic and frequent sampling, the success of pathogen  
111 surveillance and outbreak prevention will be contingent on rapid, sensitive, and specific  
112 detection techniques.

113       Next-generation sequencing (NGS) has been employed in source-tracking  
114 pathogens and has the advantage of being able to detect a wide range of pathogens at  
115 once, and it is increasingly becoming an affordable tool for use in molecular  
116 epidemiology (18, 19). While diagnostic metagenomics is still an unorthodox method in  
117 fish disease diagnostics, recent studies on viral detection and persistence in aquatic  
118 habitats (20, 21) have demonstrated the potential advantages of this technique.  
119 Amplicon deep-sequencing provides an opportunity to detect the presence of lingering  
120 etiological agents (20) and may aid in preventing future outbreaks in aquaculture  
121 settings.

122       Marker-gene surveys in particular are common and canonically performed by  
123 sequencing a variable region of the 16S rRNA gene, which is ubiquitous and allows for  
124 the discernment of bacterial taxa (22). Various approaches are available to analyze 16S

125 rRNA gene sequence data. While traditional approaches use a sequence clustering  
126 technique, a more recent approach identifies amplicon sequence variants (ASVs),  
127 where the amplified sequence reads are error-corrected, and identical sequences are  
128 placed into an ASV. This approach improves pathogen detection sensitivity and is  
129 implemented by packages such as QIIME 2 (23) and DADA2 (24). Each ASV is  
130 classified by comparing it to a reference dataset. Although the resolution obtained by  
131 sequencing a short region of the 16S rRNA gene is not sufficient to identify most taxa at  
132 the species level, different variable regions provide greater resolution for some taxa.

133 Quantitative PCR (qPCR) has long been considered a gold standard for the  
134 detection and quantification of disease-causing agents. More recently, droplet digital  
135 PCR (ddPCR) has emerged as a promising advancement on qPCR. Due to its  
136 partitioning technology and robustness against inhibitory particles, ddPCR has been  
137 shown to be an efficient and sensitive approach for detecting low-copy DNA targets and  
138 has even begun to replace traditional qPCR in specific applications (25, 26).  
139 Additionally, ddPCR results report absolute counts in a sample rather than relative  
140 frequencies as are reported with NGS-based methods (27).

141 In the present study we developed two new assays to detect two pathogenic  
142 *Flavobacterium* species, *F. columnare* and *F. psychrophilum*, in water and surface  
143 samples by (i) Illumina MiSeq sequencing and (ii) ddPCR. These methods will be useful  
144 detection tools for aquaculture facilities. We tested the utility of Illumina MiSeq high-  
145 throughput sequencing of the 16S rRNA V4 region to detect these pathogens in  
146 inoculated water samples collected from a natural source. Subsequently, these results  
147 were independently validated using a ddPCR assay targeting a different housekeeping

148 gene, ATP synthase subunit alpha (*atpA*), which is commonly used as a genetic marker  
149 in flavobacterial typing(9). In addition, water and surface samples collected from an  
150 aquaculture facility were also tested using both methods, and the results were  
151 compared.

152

## 153 **Results**

### 154 **Differentiation of *Flavobacteria* to the species level using the V4 region of the 16S** 155 **rRNA gene.**

156 A conventional approach for studying microbial communities is to perform high-  
157 throughput sequencing of a variable region of the 16S rRNA gene. However, accurate  
158 characterization of a polymicrobial sample and detection of specific pathogenic species  
159 require that the genetic diversity of the variable region permits species-level  
160 classification. Thus, to determine whether the V4 region of the 16S rRNA gene would  
161 suffice for species-level identification of fish pathogens of interest, we downloaded the  
162 16S rRNA gene sequences of all 143 available type strains of *Flavobacterium* species  
163 from the RDP database to serve as an up-to-date reference gene bank. We trimmed the  
164 sequences to the 253 base pairs of the widely used V4 region and constructed a  
165 phylogeny. The resulting phylogeny (Figure 1) and the distance matrix (data not shown)  
166 identified the closest neighbors of *F. columnare* and *F. psychrophilum* as *F.*  
167 *verecundum* and *F. limicola*, which differed by 4 and 6 base pairs, respectively. Using  
168 this approach, the V4 region was observed to provide sufficient resolution to identify *F.*  
169 *columnare* and *F. psychrophilum* to the species level.

Tree scale: 0.1

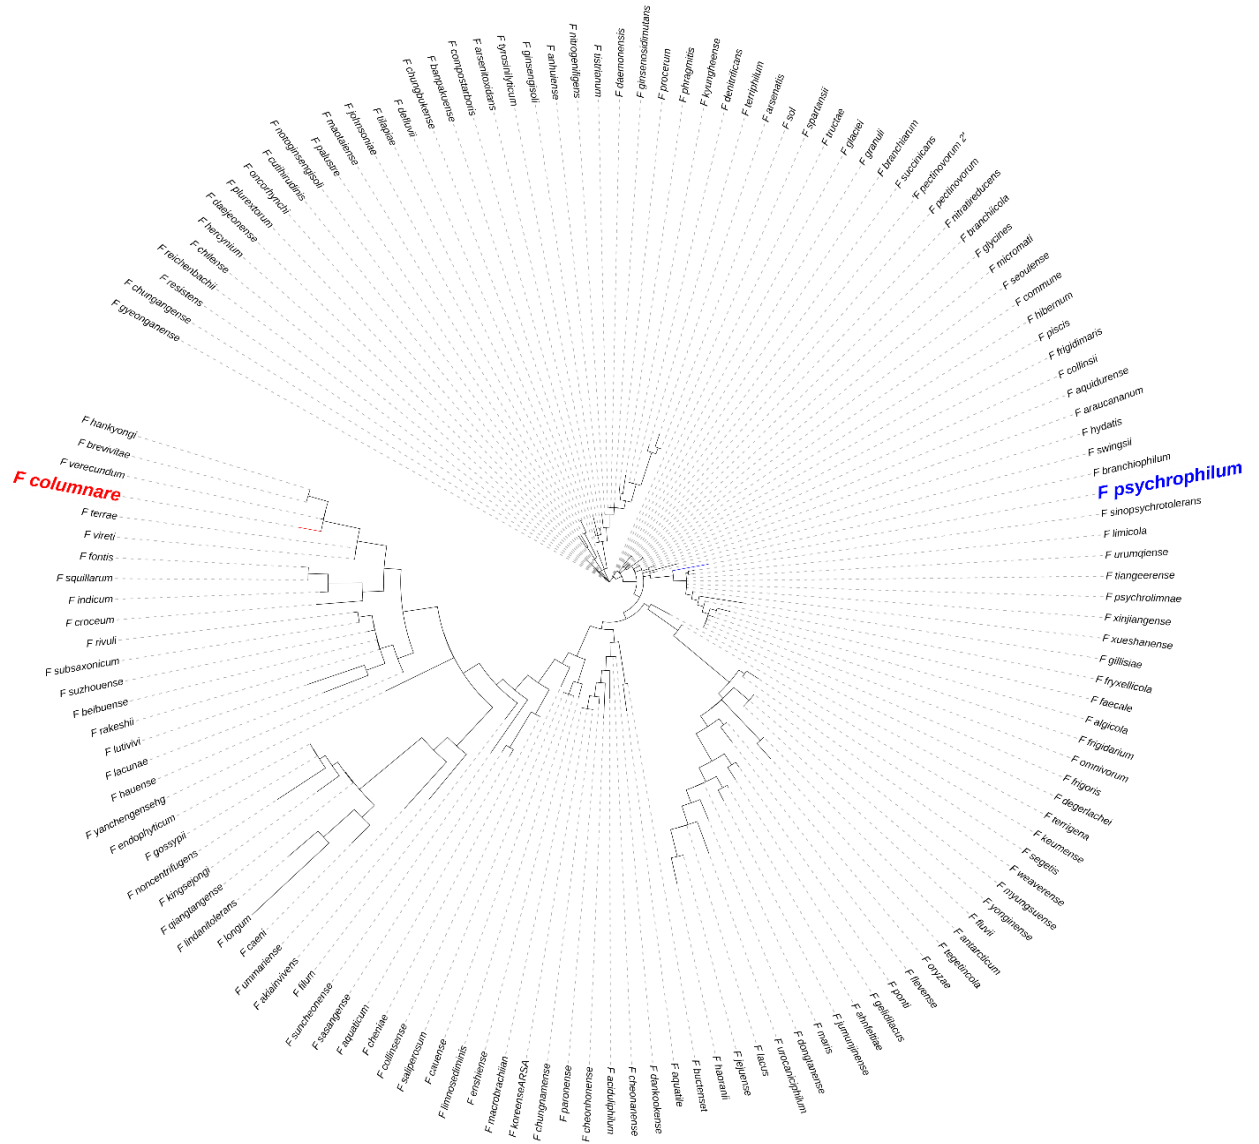

170

171 **Figure 1: 16S rRNA Gene Cladogram for the Genus *Flavobacterium*.** Sequences of

172 the 253 base pair V4 region of the 16S rRNA gene from *Flavobacterium* type strains

173 were aligned, and a phylogenetic tree was constructed using Fasttree. *Flavobacterium*

174 *columnare* (red) is 4 base pairs away from *F. verecundum*, and *F. psychrophilum* (blue)

175 is 6 base pairs away from *F. limicola*.



176 **MiSeq: Detection of spiked *F. columnare* and *F. psychrophilum* in natural water**  
177 **samples**

178         The ability to detect *F. columnare* and *F. psychrophilum* on an Illumina MiSeq  
179 was tested by inoculating and sequencing natural water samples with increasing  
180 amounts of these pathogens in three distinct dilution series (*F. columnare* alone, *F.*  
181 *psychrophilum* alone, or their combination). Each sample set was spiked with 10-fold  
182 dilutions of pathogen(s) (alone or in combination) over a five order of magnitude range.  
183 The relative levels of *F. columnare* and *F. psychrophilum* were normalized using a  
184 hemocytometer; however, accurate viable counts were difficult to obtain due to the  
185 clumping nature of *Flavobacterium* spp. Two uninoculated samples were used as  
186 controls to determine whether native *F. columnare* and/or *F. psychrophilum* could be  
187 detected and assess potential filtration system carryover between sample sets. The  
188 number of classified *F. columnare* and *F. psychrophilum* was determined using QIIME 2  
189 with a DADA2 plugin for detecting ASVs.

190         *F. columnare* was detected in all inoculated water samples excluding the lowest-  
191 inoculum sample (Figure 2) for both the *F. columnare*-only and co-inoculated sample  
192 series. *F. psychrophilum* was detected in all inoculated samples in both dilution series.  
193 No sequencing reads were assigned to either *F. columnare* or *F. psychrophilum* in the  
194 uninoculated controls. The average read depth of the 17 inoculated samples was  
195 43,853 reads with a standard error of the mean (SEM) of 3,636 reads. A total of 83,143  
196 reads in the entire data set were assigned to *F. columnare* and a total of 38,450 reads  
197 were assigned to *F. psychrophilum*. *F. columnare* was not detected in any samples  
198 where it was not expected (samples where *F. columnare* was not added). Only four *F.*

199 *psychrophilum* reads were recovered from samples where it was not expected (the  
200 highest inoculum *F. columnare* sample).

201  
202 **ddPCR: Detection of spiked *F. columnare* and *F. psychrophilum* in natural water**  
203 **samples**

204 A ddPCR-based approach was developed to independently quantify *F.*  
205 *columnare* and *F. psychrophilum* cells using a single copy housekeeping gene (*atpA*)  
206 that has been used previously for species-level discernment in a multi-locus sequence  
207 typing scheme for flavobacteria (9). These assays were optimized, validated, and tested  
208 for specificity as described in the methods section.

209 The *atpA*-ddPCR assay was used to determine the number of *F. columnare* and  
210 *F. psychrophilum* cells present in the same inoculated water samples evaluated in the  
211 Illumina MiSeq detection assay (Figure 2). As expected, the concentrations of both  
212 pathogens in each sample series mirrored the 10-fold dilutions over five orders of  
213 magnitude using the ddPCR-based assay (Figure 2). We detected ~1,000 copies of  
214 *atpA* per liter of filtered water in the most dilute samples. Since the *F. columnare* and *F.*  
215 *psychrophilum* genomes each harbor one copy of *atpA*, the observed copy number  
216 corresponds to 20 genome equivalents/ $\mu$ L of extracted DNA added to the ddPCR  
217 reaction mix (total DNA extraction volume was 50  $\mu$ L).

218 The ddPCR analysis of samples that were not inoculated allowed us to determine  
219 the background levels of *F. columnare* (280 cells/L) and *F. psychrophilum* (12,800  
220 cells/L) in the natural water samples. These counts are much higher than those  
221 obtained from the MiSeq experiment, where only a single sample, the highest inoculum  
222 *F. columnare* sample, had 3,750 cells/L *F. psychrophilum* detected (four MiSeq reads).

223 This discrepancy could be due to *F. columnare* or *F. psychrophilum* cells being present  
224 in the natural water source at levels below the detection limit of the MiSeq method,  
225 highlighting the superior sensitivity of ddPCR. Additionally, contamination may have  
226 occurred during sample processing or as a result of carry-over from previous filtration  
227 operations at levels the MiSeq approach could not easily detect. Lastly, unknown non-  
228 target organisms may have cross-reacted with the *F. psychrophilum* assay. To address  
229 this discrepancy, the average background level for each method from all non-spiked  
230 samples was subtracted from the counts shown in Figure 2.

231 For ddPCR, a no template control (NTC) as well as two positive controls  
232 containing one pathogen and one positive control containing both pathogens were  
233 assayed in parallel. The NTC was negative for both pathogens, and only the added  
234 target pathogen(s) were detected in the positive controls, indicating that the occurrence  
235 of contamination during ddPCR sample preparation is unlikely to explain the  
236 background levels of pathogens detected by ddPCR. Droplet counts per reaction  
237 ranged from 13,528 to 20,005 droplets with a median droplet count of 18,212. Overall,  
238 these data indicate that *F. columnare* and *F. psychrophilum* can be quantified over a  
239 wide range of concentrations in natural water samples using ddPCR, but proper controls  
240 must be used to ensure accuracy.

241

## 242 **Comparison of MiSeq and ddPCR Results**

243 We were interested in comparing the MiSeq and ddPCR data more directly. As  
244 16S rRNA gene MiSeq data are relative and ddPCR data are absolute, it was necessary  
245 to convert absolute numbers while accounting for multiple copies of the 16S rRNA gene

246 in individual bacterial cells. Using a universal 16S qPCR assay, we determined the 16S  
247 rRNA gene copy number in each sample (mean =  $1.36 \times 10^8$  copies, SEM =  $1.52 \times 10^7$   
248 copies). Additionally, using an estimate of the 16S rRNA gene copy number based on  
249 the taxonomic composition of these samples (28), we converted this value to the  
250 estimated total number of bacterial cells per sample (mean =  $3.6 \times 10^7$  cells/mL, SEM =  
251  $3.84 \times 10^6$  cells/mL; Figure 2, Supplementary Figure 2).

252 Subsequently, using the absolute concentration data from both the MiSeq and  
253 ddPCR assays, we compared the *F. columnare* and *F. psychrophilum* counts in the  
254 spiked samples (Supplementary Table 1). Figure 2 displays the line of best fit (dotted  
255 lines) produced from a linear regression analysis using log transformed count values.  
256 Overall, the results were highly similar between the MiSeq- and ddPCR-generated data  
257 and the single and co-inoculation samples. However, for *F. columnare*, the limit of  
258 detection differed. In the samples that received the fewest cells, *F. columnare* was not  
259 detected using the MiSeq method, whereas ~1,000 *F. columnare* genome copies were  
260 detected with the ddPCR assay (Figure 2a). This difference in detection levels is likely  
261 due to the MiSeq producing 10-100 thousand reads and having ~100,000,000 16S  
262 rRNA gene copies in the sample, which may lead to rare sequences being drowned out  
263 by more dominant species. Overall, there appeared to be excellent qualitative  
264 agreement between the two methods.

265 On a quantitative level, the estimated cell count values (Figure 2) obtained were  
266 highly similar between the two methods. For *F. psychrophilum*, the ddPCR approach  
267 yielded higher counts than the MiSeq method for 6 of 10 samples, with an average  
268 coefficient of variance (CoV) of 22%. A paired Wilcoxon signed-rank test did not support

269 a significant difference between the methods ( $p = 0.375$ ). The *F. columnare* counts  
270 obtained by ddPCR were higher than those obtained with the MiSeq approach for 6 out  
271 8 samples (only considering samples where signal was detected for both methods), with  
272 an average CoV of 25.5%, a difference that was not significant using a paired Wilcoxon  
273 signed-rank test ( $p = 0.25$ ).

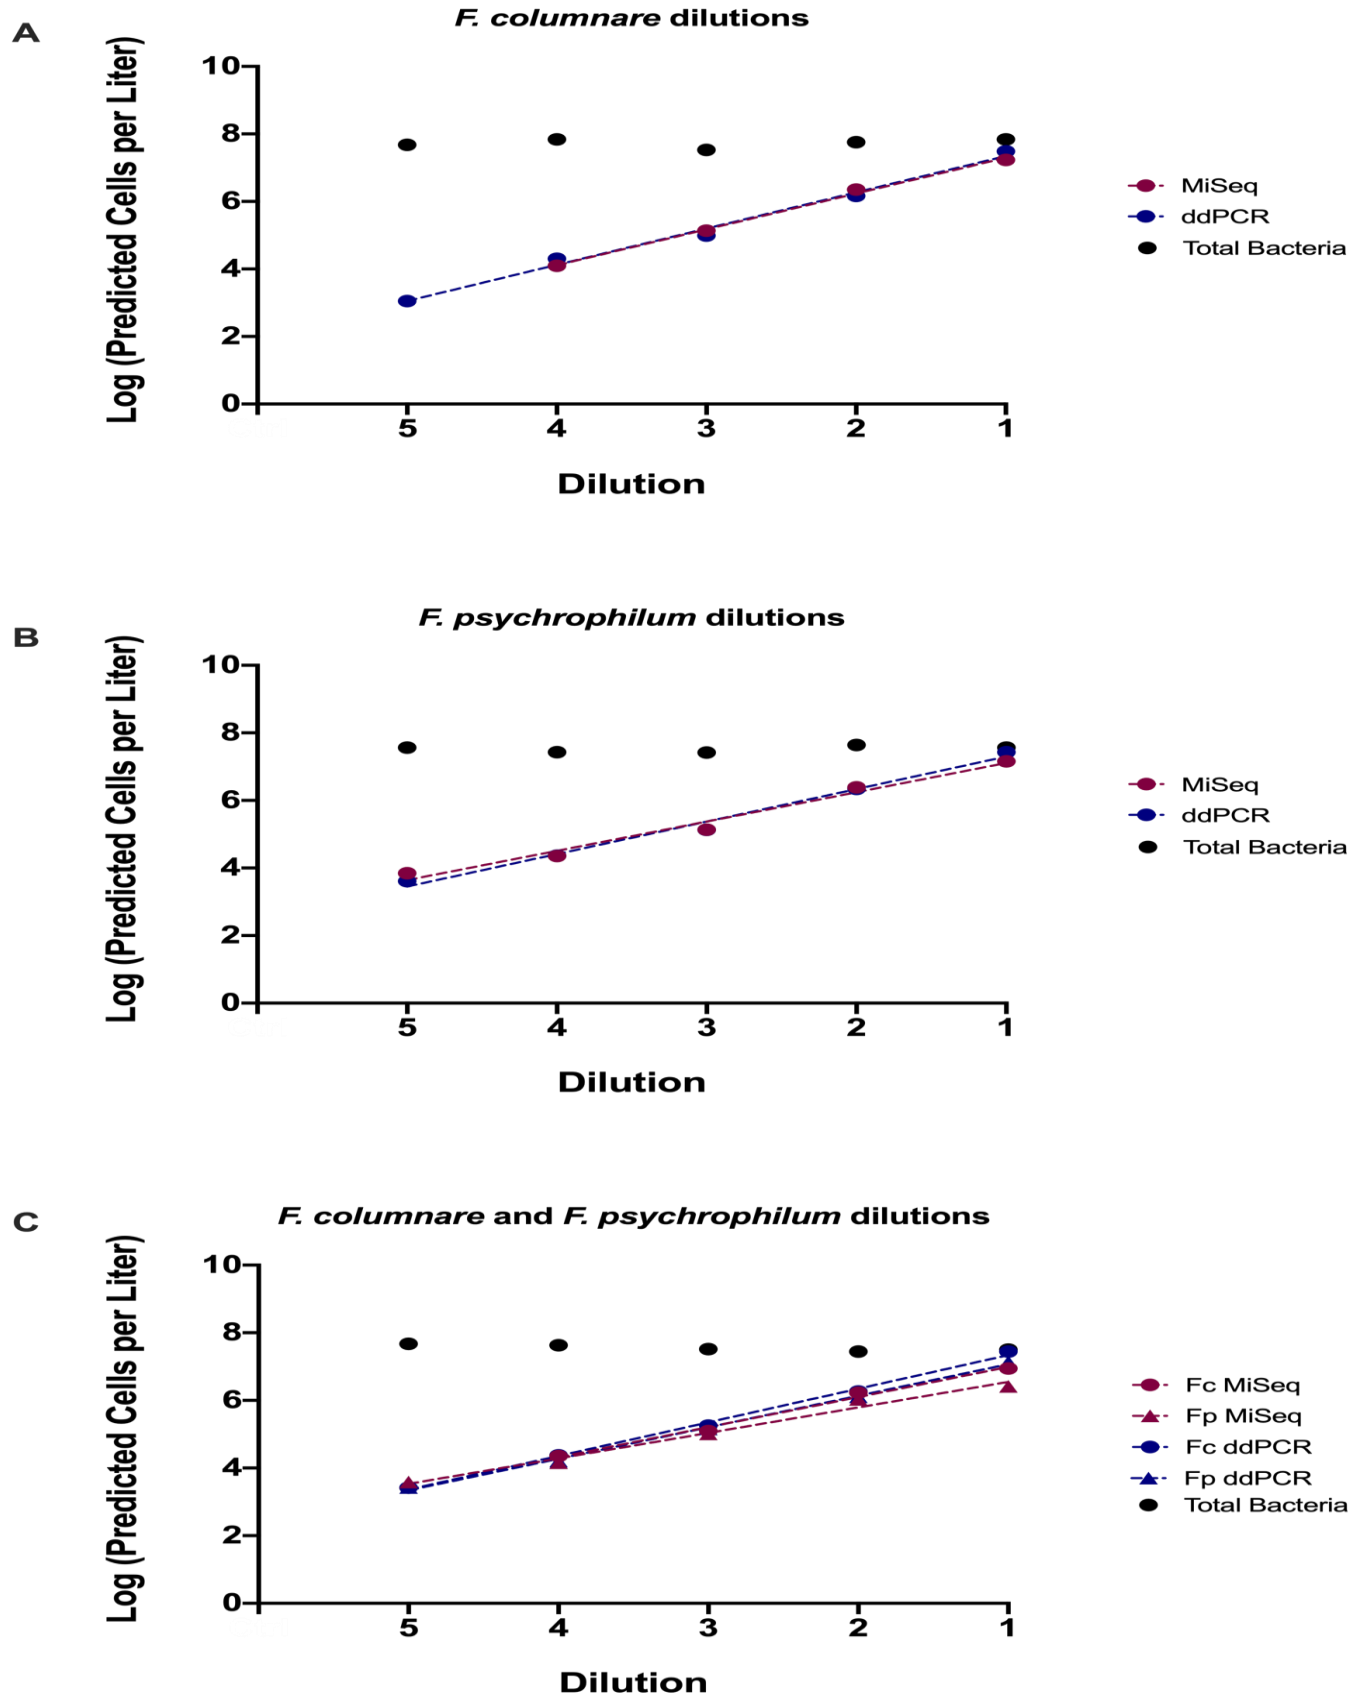

275 **Figure 2: Comparison of MiSeq and ddPCR Assay Results.** Estimated cell counts of  
276 *F. columnare* (red) and *F. psychrophilum* (blue) are shown for each of the five 10-fold  
277 dilutions assayed. Counts are shown on the y-axis as log values, while dilutions are  
278 shown on the x-axis and increase from the lowest concentration sample (5) to the  
279 highest concentration sample (1). (A) Samples inoculated with *F. columnare* alone, (B)  
280 *F. psychrophilum* alone, or (C) *F. columnare*/*F. psychrophilum* combined. The co-  
281 inoculated samples (C) show *F. columnare* counts with circles and *F. psychrophilum*  
282 counts with triangles. Black circles indicate the total estimated bacterial cell count within  
283 the sample calculated using qPCR.

284

### 285 **Pathogen Detection in Environmental Samples**

286 We used both the MiSeq and ddPCR methods to evaluate water samples and surface  
287 swabs we collected as part of a microbial community survey of an aquaculture facility.  
288 Twelve samples were collected from a commercial, spring-fed, rainbow trout farm that  
289 had previously experienced periods of BCWD and columnaris disease outbreaks. Table  
290 1 shows the results of the comparison between the two assays for *F. columnare*. In the  
291 6 samples that were positive using the MiSeq method, the ddPCR method also yielded  
292 a positive result, while 4 of 6 samples that were negative for *F. columnare* using the  
293 MiSeq method yielded extremely low positive results for the ddPCR method. As  
294 observed in the previous experiment with spiked samples of lake water, these data also  
295 suggest that the MiSeq-based approach of sequencing the V4 region of the 16S rRNA  
296 gene is less sensitive than an *atpA*-based ddPCR assay. Alternatively, these results  
297 may also suggest that qPCR-based methods are more sensitive to contamination. As

298 none of the aquaculture samples contained *F. psychrophilum* as detected by either  
299 method, we could not perform this comparison.

300

301 **Table 1: MiSeq and ddPCR *F. columnare* Detection Results.** A positive call using the  
302 MiSeq required one or more *F. columnare* reads when normalized to 10,000 reads. A  
303 positive call for ddPCR required 40 or more *F. columnare* copies to be detected per 50  
304  $\mu$ L DNA extract. (+) indicates that less than 2 copies were detected per DNA extract  
305 with the ddPCR method or less than 1 read per 10,000 detected with the MiSeq  
306 method.

|                                       | <b>MiSeq (16S-V4)</b> | <b>ddPCR (<i>atpA</i>)</b> |
|---------------------------------------|-----------------------|----------------------------|
| Natural Source Water                  | (+)                   | (+)                        |
| Global Hatchery Outflow Water         | +                     | +                          |
| Individual Hatchery Pen Outflow Water | +                     | +                          |
| Surface Swab from Tailscreen          | +                     | +                          |
| Adult Raceway Outflow Water 1         | +                     | +                          |
| Adult Raceway Outflow Water 2         | +                     | +                          |
| Surface Swab from Hatchery Baffle 1   | -                     | -                          |
| Surface Swab from Hatchery Baffle 2   | -                     | (+)                        |
| Surface Swab from Hatchery Baffle 3   | -                     | (+)                        |
| Surface Swab from Hatchery Baffle 4   | -                     | (+)                        |
| Gill Swab from Adult Fish             | -                     | (+)                        |
| Global Hatchery Inflow Water          | -                     | -                          |

307

### 308 **Microbial Community Analysis of Natural Water Samples**

309 While not the focus of the present study, a high-throughput and multiplexable  
310 16S rRNA gene survey provides useful microbial community composition data as an  
311 added benefit. This advantage is particularly notable for the V4 region of the 16S rRNA  
312 gene, which serves as an ideal molecular marker for identifying the widest diversity of  
313 bacteria (29). Therefore, to further demonstrate the advantages of this approach, we  
314 sequenced and analyzed 17 biological replicates of the pelagic community of a  
315 freshwater lake (Figure 3, Supplementary Figure 3). As the water was prefiltered



316 through a 2 µm pore sized prefilter, we considered the cells captured on the 0.2 µm  
317 Sterivex filter to be planktonic microorganisms.

318 At the order level, Betaproteobacteriales dominated the community, accounting  
319 for 51.8% of all reads, with constituents present at or above 1% abundance including  
320 Flavobacteriales (20.7%), Cytophagales (5.7%), Frankiales (4.9%), Chitinophagales  
321 (4.0%), Sphingobacteriales (3.4%), and chloroplast-associated reads (1.2%) (Figure  
322 3A). A visualization of this community with the spiked *Flavobacterium* spp. removed is  
323 presented in Supplementary Figure 3A.

324 At the genus level, 20.0% of reads belonged to the genus *Flavobacterium*, which  
325 included the spiked *Flavobacterium* spp. In addition, 14.0, 8.7, 5.5% of the total reads  
326 belonged to the genera *Rhodoferax*, *Polaromonas*, and *Polynucleobacter*, respectively,  
327 all of which are members of the family Burkholderiaceae. An additional 14.6% of reads  
328 were assigned to the family Burkholderiaceae but could not be confidently assigned to  
329 any specific genus. Other genera present at or above 1% included *Pseudarcicella*  
330 (5.6%), *Methylotenera* (4.7%), *Sediminibacterium* (3.7%), *Limnohabitans* (2.1%), and  
331 *Pedobacter* (1.1%) (Figure 3B). A visualization of this community with the spiked  
332 *Flavobacterium* spp. removed is presented in Supplementary Figure 3B.

333

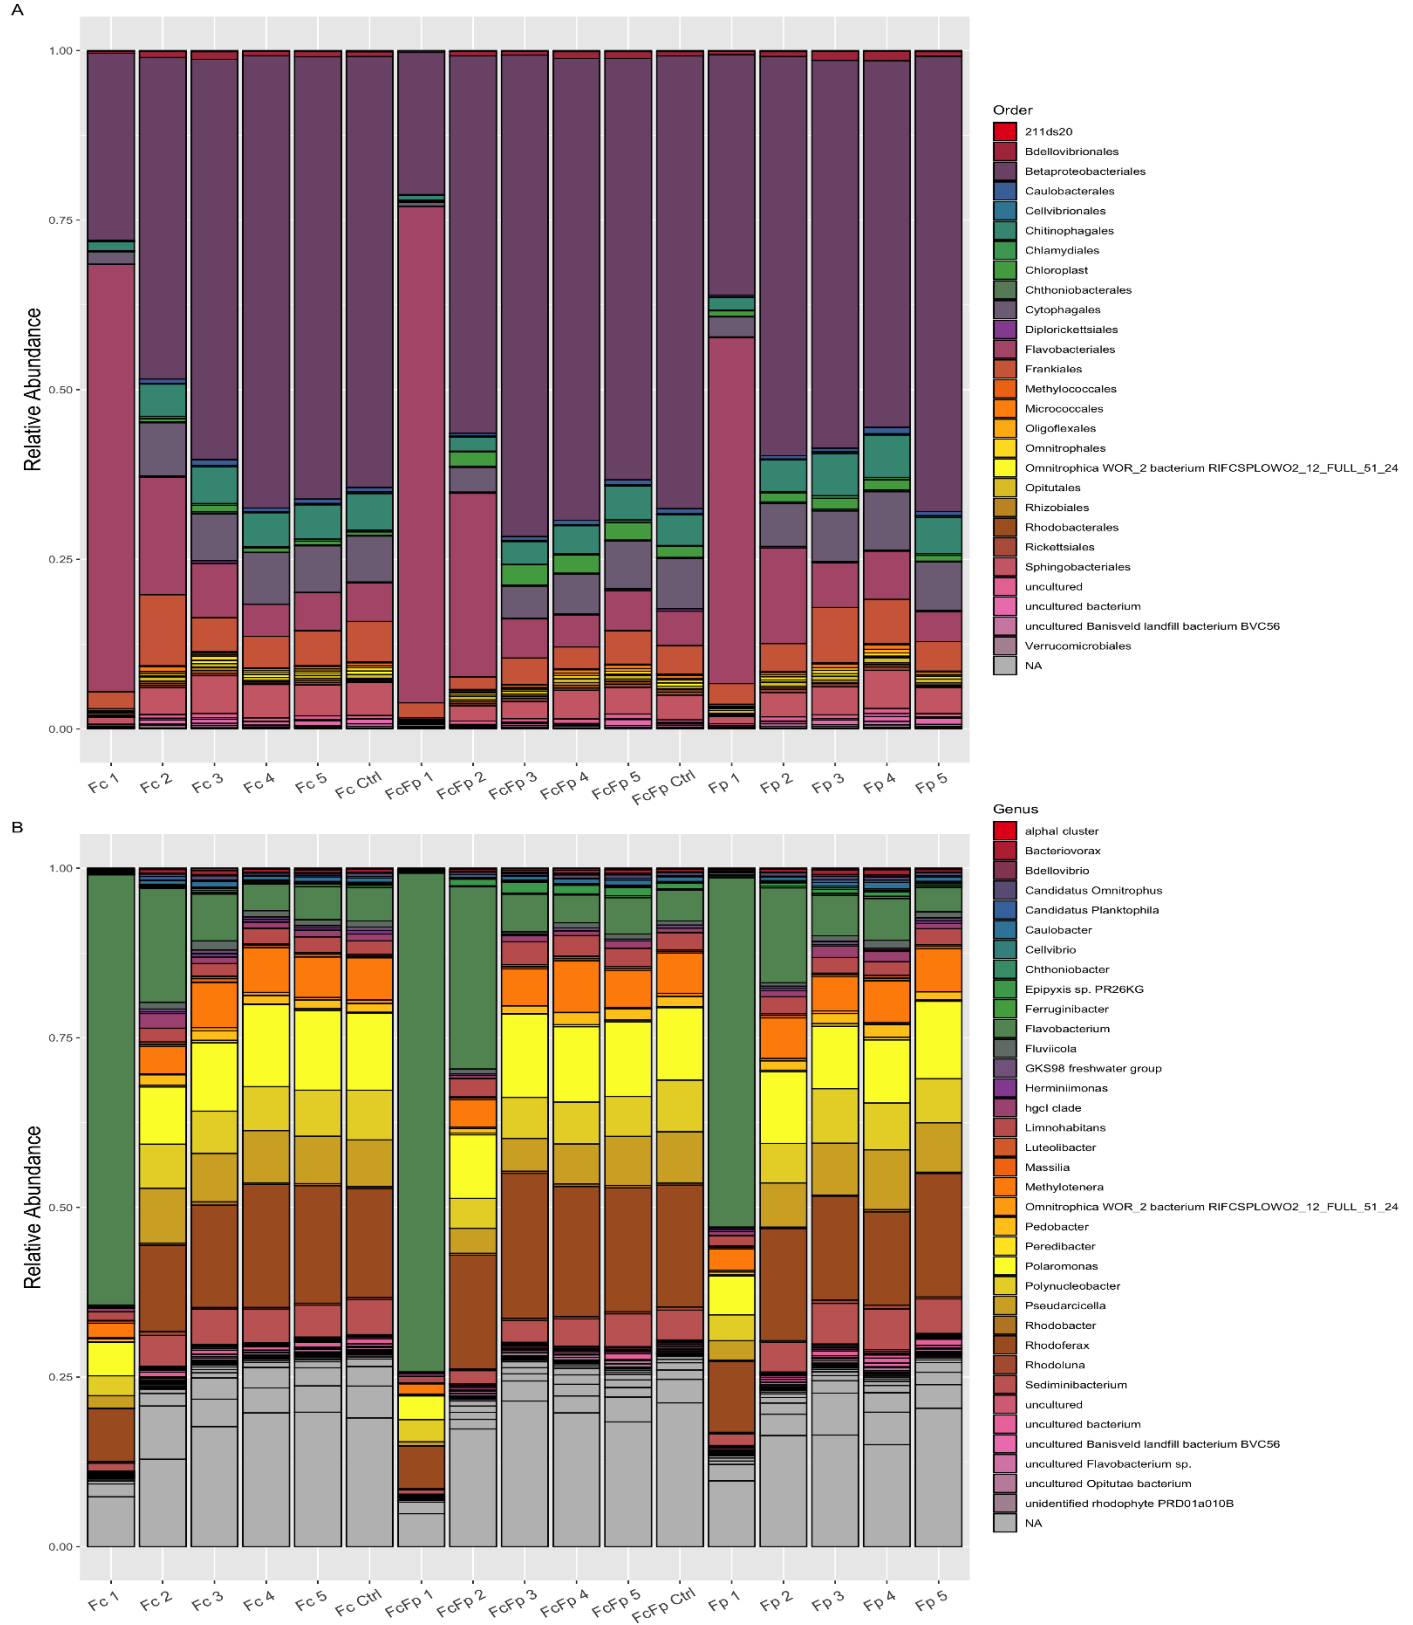

335 **Figure 3: Order and Genus Level Taxonomic Barplots of Water Samples.** (A) Order  
336 level taxonomic breakdown for each sample. (B) Genus level taxonomic breakdown for  
337 each sample. Labels on the x-axis correspond to the dilution series. Barplots are  
338 presented as relative abundances. *Flavobacterium* inoculum level decreases from left to  
339 right for each series. Fc, Fp and FcFp indicate the addition of *F. columnare* alone, *F.*  
340 *psychrophilum* alone or their combination, respectively. NA – no assignment could be  
341 made at this taxonomic level.

## 342 Discussion

343 In the present study, we describe the use of Illumina MiSeq sequencing and  
344 ddPCR for the detection of two economically impactful fish pathogens, *F. columnare*  
345 and *F. psychrophilum*. We provide direct evidence that MiSeq sequencing of the V4  
346 region of the 16S rRNA gene allows species-level identification of *F. columnare* and *F.*  
347 *psychrophilum*. In addition, we describe a ddPCR assay to detect and quantify these  
348 two important fish pathogens, which were detected at similar levels independent of the  
349 method used.

350 Overall, there was good qualitative agreement between the Illumina MiSeq and  
351 ddPCR detection of *F. columnare* and *F. psychrophilum*. Statistical testing did not show  
352 a significant difference between the quantified levels of *F. psychrophilum* and *F.*  
353 *columnare* using the MiSeq and ddPCR approaches. However, one important difference  
354 between the approaches is the limit of detection. Based on the ddPCR quantification  
355 data, a detection limit of  $\sim 10^3$  *F. columnare* cells/L was observed for the MiSeq method,  
356 while the ddPCR method could detect  $10^2$  cells/L. The limit of detection of the MiSeq  
357 can be lowered by sequencing to a greater depth, but this would also drive up the

358 overall sequencing costs. A non-targeted NGS-based detection approach requires that  
359 the organism of interest be present at a high enough concentration to yield a signal in a  
360 complex DNA background (30), which is affected by the sequencing depth. A targeted  
361 PCR approach will always outperform a non-specific approach in regard to sensitivity.  
362 From a clinical perspective, this difference in the detection limit may be inconsequential,  
363 as LD<sub>50</sub> measurements of *F. columnare* and *F. psychrophilum* are on the scale of 10<sup>8</sup>-  
364 10<sup>10</sup> cells/L for immersion or bath-based infection of rainbow trout (31, 32), well within  
365 the detectable range for NGS. Furthermore, due to the slow growth rates of *F.*  
366 *columnare* and *F. psychrophilum*, remediation begun at concentrations of 10<sup>3</sup> cells/L will  
367 likely be effective in keeping concentrations well below the LD<sub>50</sub>

368         Compared to *F. columnare*, determining the limit of detection for *F.*  
369 *psychrophilum* was more challenging due to an apparent background level of *F.*  
370 *psychrophilum* in the water samples. This may have been caused by the true presence  
371 of *F. psychrophilum*, cross-reaction between an off target organism and the primers and  
372 probe, or potential carry-over within the filtration system. However, if contamination  
373 occurred or *F. psychrophilum* was present in the water, it was not detected by the  
374 MiSeq assay, suggesting a cross-reaction with an unknown organism was the likely  
375 cause. While the specificity of the primers and probe were bioinformatically verified, the  
376 potential for uncharacterized species presents a risk for a false positive signal arising.  
377 We observed a baseline of ~10<sup>4</sup> *F. psychrophilum* cells in the ddPCR analysis of  
378 negative samples. This cross-reactivity was accounted for using a baseline subtraction  
379 step for the ddPCR data. By adding a known quantity of target DNA to replicate

380 samples, the presence of cross-reacting DNA can be determined and accounted for in  
381 the data analysis.

382         The benefit of the discovery power added by characterizing the microbial  
383 community provided by NGS cannot be overstated. Using this approach, associations  
384 between various bacterial taxa and the pathogen of interest can be elucidated, whereas  
385 a targeted approach would miss potential hypothesis-generating observations. The  
386 potential of other pathogenic bacteria being identified using NGS would also increase  
387 the utility of this approach and should be assessed in the future. Compared to ddPCR, a  
388 false positive signal arising from NGS is unlikely but possible in the case of primer  
389 switching or contamination from wells on the same PCR plate. However, the increased  
390 information density produced by this approach increases the odds of correctly parsing  
391 out a misidentified sequence. Additionally, it is important to note that because an  
392 abundance-filtering step is often performed during pre-processing with NGS datasets  
393 (33), low levels of false positive or contaminant reads would be removed as a normal  
394 portion of the pipeline. In addition, the inclusion of reagent, negative, and positive  
395 controls ensures that contaminants can be more readily detected and removed.

396         The results obtained for the fish farm samples displayed good agreement  
397 between the two methods in detecting the presence/absence of *F. columnare* (Table 1).  
398 This result is important, as it was possible to detect this pathogen in both the water and  
399 swab samples with the MiSeq. However, the two methods showed disagreement for  
400 four surface swab samples in which extremely low levels of *F. columnare* were detected  
401 using the ddPCR method but not the MiSeq method. This result may well demonstrate  
402 the superior sensitivity of ddPCR in detecting extremely low levels of target sequences.

403 However, this finding may also indicate minor contamination or a PCR artifact leading to  
404 a false positive signal. An additional benefit to ddPCR methods is the ability to rapidly  
405 process low numbers of samples without increasing the price per sample, while many  
406 samples must be assayed at once to decrease the financial input when using the  
407 MiSeq.

408         Although previous studies have demonstrated the potential of NGS in pathogen  
409 detection, these investigations typically used shotgun metagenomic sequencing (34, 35)  
410 or targeted approaches with genus-specific primers (36). While shotgun approaches  
411 can generally provide better resolution, they are significantly more expensive (37),  
412 suffer from background or host DNA interfering with detection (34), and require a more  
413 complex bioinformatic approach. Targeted NGS methods provide useful information on  
414 strain variation within the particular genus of interest but lose the survey capabilities  
415 borne from an unbiased approach. In the present study, we demonstrate that specific  
416 pathogens with distinct hypervariable regions in the 16S rRNA gene can be reliably and  
417 semi-quantitatively detected using a non-targeted NGS method. While not solely  
418 intended for use in diagnostic settings, we posit that an NGS-based approach to detect  
419 *F. columnare* and *F. psychrophilum* is reliable, has similar processing time compared to  
420 culture-based methods (38), and provides additional discovery power that can justify  
421 increased cost for a research group.

422

423

424

## 425 **Methods**

### 426 Phylogeny of *Flavobacterium* type strain 16S rRNA gene sequences

427 The 16S rRNA gene sequences were downloaded from the Ribosomal Database  
428 Project (RDP) database (39) in February 2021. The 253 bp V4 region of the 16S rRNA  
429 gene was extracted and aligned using Geneious (version 10.0.6; Biomatters, Auckland,  
430 NZ) using a Geneious alignment algorithm. A phylogeny was then constructed in  
431 Geneious using Fast Tree (version 2.1.5) (40, 41) with a generalized time reversible  
432 model. A Newick file was then exported from Geneious into iTOL (version 6) (42) for  
433 additional annotation and export.

434

### 435 *Flavobacterium* cells and growth conditions

436 The *F. columnare* ATCC 23463 and *F. psychrophilum* ATCC 49418 type strains were  
437 obtained from ATCC (Manassas, VA, USA). Strains were grown on Anacker and Ordall  
438 (A&O) agar (43) to reduce clumping (44) and incubated at 22°C for ~36 h. For liquid  
439 cultures, a single colony was grown in A&O broth for 36 h with shaking at 22°C for 36 h.

440

### 441 Sample filtration

#### 442 *Preparation of F. columnare- and F. psychrophilum-spiked water samples*

443 Lake water was collected to ensure that samples would contain a natural freshwater  
444 microbial community and have sufficient biomass for downstream processing. Nineteen  
445 liters of water were collected on March 29, 2019 from the Mansfield Hollow Lake in  
446 Mansfield, CT, USA (41.768568°, -72.174603°). The lake water was prefiltered before  
447 use as described in the next section. Then, the cultured bacteria were enumerated with

448 a hemocytometer and added to 1 L aliquots of prefiltered lake water to generate a 10-  
449 fold dilution series. To ensure proper mixing, bacterial aliquots were added to 50 mL of  
450 sterile water prior to being added to 1 L of the prefiltered lake water.

451

#### 452 *Water filtration*

453 A previously described filtration system (45) was employed in the present study with the  
454 following modifications. First, larger particles capable of clogging the system were  
455 removed by pumping the lake water sample through a 2 µm pore size prefilter (Sigma  
456 Aldrich, St. Louis, MO, USA, Cat # AP2502500) and collected in a sterile vacuum flask.  
457 After inoculating the filtrate, the total sample was aseptically mixed and filtered using a  
458 0.2 µm pore size Sterivex filter unit (Fisher Scientific, Waltham, MA, USA, Cat #  
459 SVGPL10RC).

460

461 One liter of molecular grade water (Fisher Scientific, Cat # BP2819-1) was filtered  
462 before the experimental samples and analyzed as a system control to ensure the  
463 filtration system was sterile. The samples were filtered in the following order:  
464 uninoculated lake water; increasing concentrations of *F. columnare* cells; increasing  
465 concentrations of *F. psychrophilum*; uninoculated lake water; and increasing  
466 concentrations of 1:1 mixtures of *F. columnare* and *F. psychrophilum*. The filtration  
467 system was rinsed with 70% ethanol and molecular grade water (Fisher Scientific, Cat #  
468 BP2819-1) between each filtration group before the next sample set. After filtering, the  
469 Sterivex filter units were immediately frozen at -20°C.

470



471 DNA isolation

472 DNA was extracted from Sterivex filters using a Qiagen (formerly MoBio) Sterivex  
473 PowerWater DNA Isolation Kit (Qiagen, Hilden, Germany) following the manufacturer's  
474 protocol. DNA was eluted in 50  $\mu\text{L}$  of buffer EB and quantified with a Qubit HS dsDNA  
475 Assay Kit (Life Technologies, Carlsbad, CA, USA), with dsDNA concentrations ranging  
476 from 4.1 to 11.8 ng/ $\mu\text{L}$ .

477

478 16S rRNA gene amplicon sequencing on an Illumina MiSeq

479 *PCR amplification*

480 The V4 hypervariable region of the 16S rRNA gene was amplified in each sample using  
481 previously validated primers that contained dual-end adapters for indexing. PCR  
482 reactions were set-up in a total volume of 83.4  $\mu\text{L}$ . Reactions contained 3  $\mu\text{L}$  of BSA  
483 (New England Biosciences (NEB), Ipswich, MA, USA), 41.7  $\mu\text{L}$  of Phusion 2x Master  
484 Mix (NEB), 2.5  $\mu\text{L}$  of 10  $\mu\text{M}$  primer mix (515F forward and 806R reverse rRNA gene V4  
485 primers with Illumina MiSeq adaptors), and 30 ng of sample DNA. Each sample was  
486 assayed in triplicate using a Bio-Rad C1000 Touch Thermocycler (Bio-Rad  
487 Laboratories Inc., Hercules, CA, USA) with the following parameters: an initial  
488 denaturation for 3 min at 94°C followed by 30 cycles of 45 sec at 94°C, 60 sec at  
489 50°C, and 90 sec at 72°C, with a final elongation step of 10 min at 72°C.

490

491 *Library preparation and MiSeq sequencing*

492 Triplicate reactions were pooled and assayed on a QIAxcel (Qiagen) to verify product  
493 size and determine DNA concentrations. Samples were then pooled and cleaned using

494 a GeneRead Size Selection Kit (Qiagen, Cat # 180514) before being diluted to  
495 approximately 4 nM for loading onto an Illumina MiSeq (Illumina, San Diego, CA, USA).  
496 An Illumina 500 cycle MiSeq Reagent Kit v2 (Illumina, Cat # MS-102-2003) was used  
497 for paired-end sequencing of all libraries.

498

#### 499 Bioinformatic processing

##### 500 *QIIME 2*

501 16S rRNA V4 gene sequence data obtained from an Illumina MiSeq were demultiplexed  
502 through BaseSpace (basespace.illumina.com). Paired-end data was then imported into  
503 QIIME 2 (version 2019.4; <https://docs.qiime2.org/2019.4/>), and reads were filtered,  
504 denoised, and dereplicated using the DADA2 denoise-paired plugin (24) Sequences  
505 were taxonomically classified and compiled using the feature-classifier (46) and taxa  
506 (<https://github.com/qiime2/q2-taxa>) plugins. Taxonomy was assigned using a pre-  
507 trained Naïve Bayes classifier based on the Silva 132 99% OTU database  
508 (<https://www.arb-silva.de/documentation/release-132/>), with reads trimmed to only  
509 include the region bound by the 515F/806R primer pair. Read counts for taxa of interest  
510 were obtained from the csv download function within the barplot visualization provided  
511 by QIIME 2. Default QIIME 2 processing parameters were used throughout the workflow  
512 except where otherwise noted. All commands and related parameters can be viewed at  
513 <https://github.com/joerggraf/lab>.

514

##### 515 *ddPCR*

516 Primers and probes were designed using Geneious (version 10.0.6; Biomatters) and are  
517 listed in Supplementary Table 2. A 200-bp region of the *atpA* gene was selected for  
518 ddPCR analysis using primers and probes unique to *F. columnare* and *F.*  
519 *psychrophilum*. Although a range of primer and probe concentrations were examined for  
520 optimum positive/negative droplet separation, the Bio-Rad recommendations of 900 nM  
521 primer and 250 nM probe were ultimately used to generate the data shown in the  
522 present study. The assay was also optimized using an annealing temperature gradient  
523 of 54-59°C. Optimal positive/negative droplet separation occurred at 58°C, with no  
524 improvement noted at increased temperatures and a slight decrease in the signal:noise  
525 ratio observed at 59°C. An annealing/extension temperature of 58°C was selected for  
526 use in all subsequent experiments. *HaeIII* was used for restriction digestion of template  
527 DNA to decrease droplet rain and, per Bio-Rad recommendations, was included within  
528 the reaction mixture after being bioinformatically and experimentally shown not to cut  
529 within the target region.

530 Primer specificity was tested on 21 strains of bacteria including *Flavobacterium* spp.  
531 (including the ATCC type strains used in the present study) and other closely related  
532 genera. Probe specificity was tested on 9 *F. columnare* strains representing the 4  
533 groups of this species (9). The *F. columnare* assay was shown to be specific for group 1  
534 *F. columnare* (which includes the type strain used in the present study). The *F.*  
535 *psychrophilum* assay was specific for all tested *F. psychrophilum* strains. Neither assay  
536 reacted with non-target *Flavobacterium* spp., which included no cross-reactivity  
537 between the *F. columnare* and *F. psychrophilum* assays.

538 Dilution series of *F. columnare* and *F. psychrophilum* in water were used to determine  
539 the limit of detection for this method, which was calculated as  $1 \times 10^{-5}$  ng of genomic  
540 template per reaction with a limit of quantitation of  $1 \times 10^{-4}$  ng of genomic template per  
541 reaction. Primer specificity was tested by performing ddPCR in the presence of an  
542 excess of eukaryotic (fish) or prokaryotic [ZymoBIOMICS Microbial Community DNA  
543 Standard (Zymo Research, Irvine, CA, USA)] DNA. At excess DNA concentrations of up  
544 to 12 ng/reaction (prokaryotic) or 19 ng/reaction (eukaryotic) ( $\sim 1-2 \times 10^5$  times more  
545 than genomic template), the limit of quantitation was maintained at  $1 \times 10^{-4}$  ng genomic  
546 template per reaction.

547 The optimum reaction contained 1× ddPCR SuperMix for Probes (no dUTP) (Bio-Rad),  
548 900 nM forward primer, 900 nM reverse primer, 250 nM each probe, 10 U of *HaeIII*  
549 (NEB), and >0.1 pg of genomic template DNA. The optimum reaction conditions were  
550 as follows: 10 min of activation at 95°C activation followed by 40 cycles of (30 sec of  
551 denaturation at 94°C and 1 min of annealing/extension at 58°C, with a final incubation at  
552 10 min 98°C for deactivation. Reactions and droplets were prepared according to  
553 recommendations outlined by Bio-Rad. Droplets were read and analyzed using a  
554 QX200 ddPCR system (Bio-Rad) with the QuantaSoft software package (version  
555 1.7.4.0917).

556

557 One-microliter aliquots of DNA extracted from the spiked natural water samples were  
558 used to determine total numbers of pathogenic flavobacteria using ddPCR. DNA from  
559 samples with high *Flavobacterium* loads were diluted 1:10 to prevent droplet saturation.  
560 All reactions were simultaneously assayed in duplex to detect both *F. columnare* and *F.*

561 *psychrophilum*. For comparison to the MiSeq data, read counts were adjusted by  
562 subtracting the average read count from the non-spiked samples (7 samples for *F.*  
563 *columnare* and *F. psychrophilum* each).

564

#### 565 qPCR

566 A qPCR assay for 16S rRNA gene quantification was utilized for the present study as  
567 previously described (47) (Supplementary Table 2). This assay targets the region of the  
568 16S rRNA gene bound by the 27F and 519R eubacterial primers (48, 49).

569

570 qPCR was performed using an EvaGreen (dye-based) assay on a CFX96 Touch Real-  
571 Time Thermocycler (Bio-Rad). Reactions were assembled using 2× SsoFast EvaGreen  
572 Master Mix (Bio-Rad), 27F and 519R eubacterial 16S primers at 300 nM final  
573 concentration, 5 µL of sample or standard DNA, and PCR-grade water to final volume of  
574 20 µL per reaction. Thermocycling conditions were as follows: 98°C for 3 min followed  
575 by 40 cycles of 98°C for 10 sec, 55°C for 30 sec with a plate read step directly following  
576 each cycle. Data analysis was performed using Bio-Rad CFX Manager (version 3.1).  
577 Single threshold quantification cycle (Cq) value determinations were made with a  
578 baseline subtracted curve fit. Baseline and threshold values were automatically  
579 determined by CFX Manager.

580

581 Standards were generated from extracted *F. psychrophilum* genomic DNA. The genome  
582 size of the *F. psychrophilum* type strain (2.72 Mb) was retrieved from NCBI and used to  
583 calculate the estimated number of copies of the 16S rRNA gene per nanogram of

584 genomic DNA taking into account the gene copy number (6 copies). The standard curve  
585 had an efficiency of 111.2% and an  $R^2$  value of 0.991 with a slope of -3.079 and a y-  
586 intercept at 33.262 (Supplementary Figure 1).

587

588 All samples (diluted 1:10) fell within the range of the standard curve except two  
589 samples; the negative control *F. columnare* sample and *F. psychrophilum* sample with  
590 the second-lowest inoculum. These samples failed to amplify at the 1:10 dilution,  
591 possibly due to PCR inhibition. For these two cases, a 1:100 dilution was used for  
592 quantification, as amplification clearly occurred in these samples. Three NTCs were  
593 assayed, and two had detectable Cq values of 26.15 and 30.35. Based on the standard  
594 curve, these Cq values correspond to less than  $10^2$  bacterial cells in each reaction. This  
595 low-level detection is likely due to minor contamination and is not high enough to cause  
596 any noticeable change in calculated copies in the actual samples.

597

598 The total bacterial cell count was calculated by dividing the 16S rRNA gene count by the  
599 estimated median 16S rRNA gene copies per cell in the environment, which was  
600 informed by order-level taxonomic profiling using Illumina MiSeq 16S rRNA gene  
601 sequencing. The calculation is summarized as follows: the Flavobacteriales read count  
602 was multiplied by the V4 copy number of inoculated *Flavobacterium* species plus the  
603 Betaproteobacteriales read count multiplied by the median gene copy number (GCN) for  
604 this bacterial order in the ribosomal RNA operon copy number database (rrnDB)  
605 (50)The resulting value was then divided by the sum of the Betaproteobacteriales and  
606 Flavobacteriales read counts. This number varied from sample to sample depending on

607 the proportion of Flavobacteriales to Betaproteobacteriales (the two dominant bacterial  
608 orders in these samples). Higher inoculum samples had a higher estimated average  
609 16S rRNA GCN due to *F. psychrophilum* and *F. columnare*, both with higher 16S rRNA  
610 GCN than the determined median for the Betaproteobacteriales, making up a larger  
611 proportion of the microbial milieu.

612

### 613 *Controls*

614 Samples that were not inoculated with the target strains were used as additional  
615 negative controls, resulting in 7 negative controls for each species. For *F. columnare*,  
616 zero reads were detected in the negative control samples. For *F. psychrophilum*, low  
617 levels were detected in 1 of 7 negative control samples. Additionally, for MiSeq  
618 sequencing, negative and mock community controls were assayed to account for  
619 potential contamination and PCR bias issues. Negative controls included PCR and  
620 extraction negative controls, neither of which presented a significant number of reads,  
621 indicating that contamination was not a major concern at these steps. The mock  
622 bacterial community control yielded the expected community composition as specified  
623 by Zymo Research.

624

625 *Data availability:* Raw read data are available in the NCBI SRA database under project  
626 ID PRJNA732893.

627

628 *Code availability:* Source code, including QIIME 2 processing commands and R  
629 commands used, is available at [https://github.com/joerggraflab/16S-Flavobacterium-](https://github.com/joerggraflab/16S-Flavobacterium-Detection)  
630 [Detection](#).

631  
632 *Acknowledgments:* We thank the UConn Microbial Analysis, Resources, and Services  
633 (MARS) facility for performing the sequencing work. We thank Ahmad Hassan and  
634 Mariya Riat for helping with the processing of the lake water filtration samples. We  
635 thank Dr. Thomas Loch and Dr. Benjamin LaFrentz for providing strains used during the  
636 ddPCR assay validation. We thank Dr. Jeremiah Marden for providing feedback and  
637 editing the manuscript. This work was funded by the United States Department of  
638 Agriculture (USDA) under grant number 8082-32000-006-00-D.

639

640

641

642

643

644

645



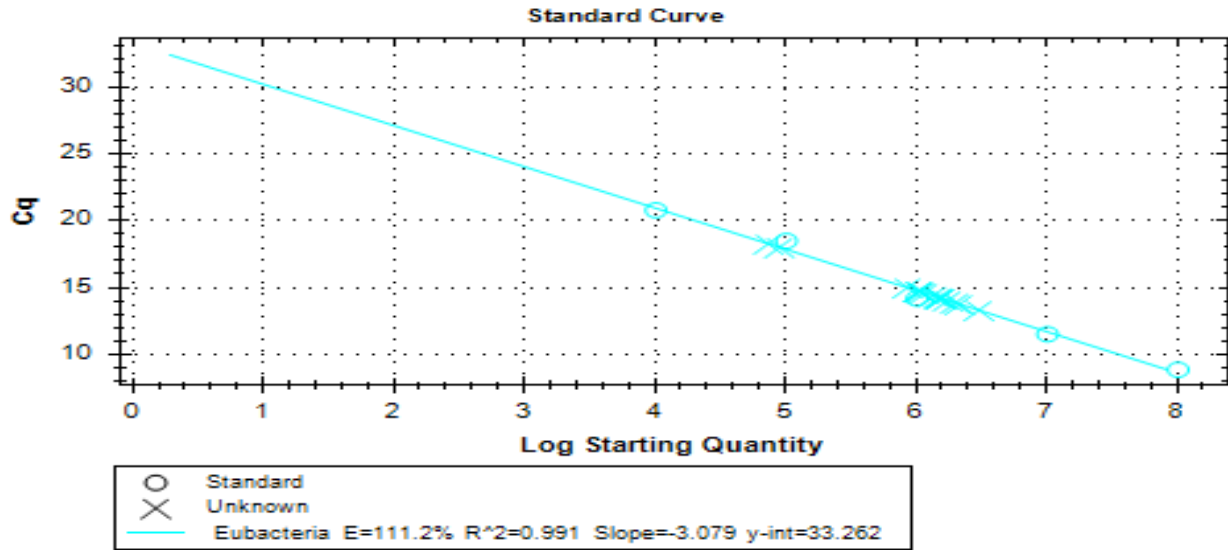

646

647 **Supplementary Figure 1: Standard Curve for**

648 **Eubacterial 16S rRNA Gene Quantification. Circles**

649 represent standards and x's represent samples.

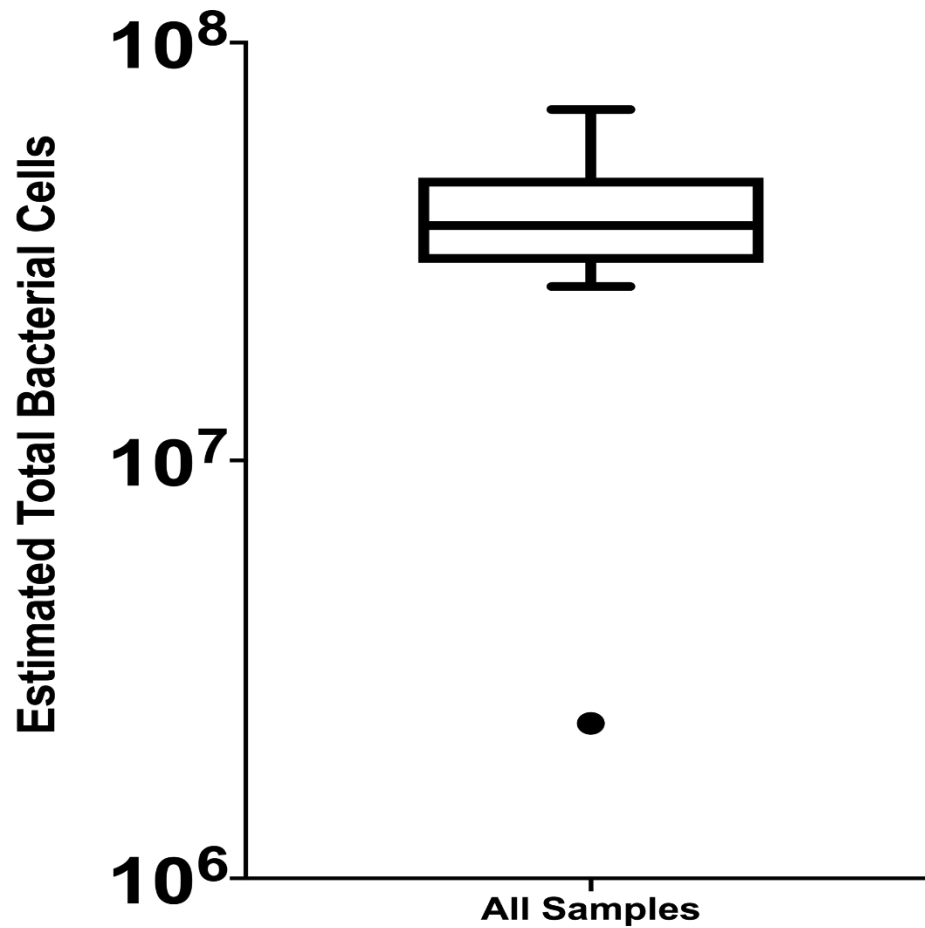

650

651 **Supplementary Figure 2: Boxplot of Estimated Total**  
652 **Bacterial Cells as Determined by qPCR.** All samples are  
653 presented in this boxplot for all dilution series, including  
654 negative samples. One outlier is noted that was the  
655 negative sample for the dilution series with *F. columnare*  
656 alone. The boxplot is presented in Tukey style.

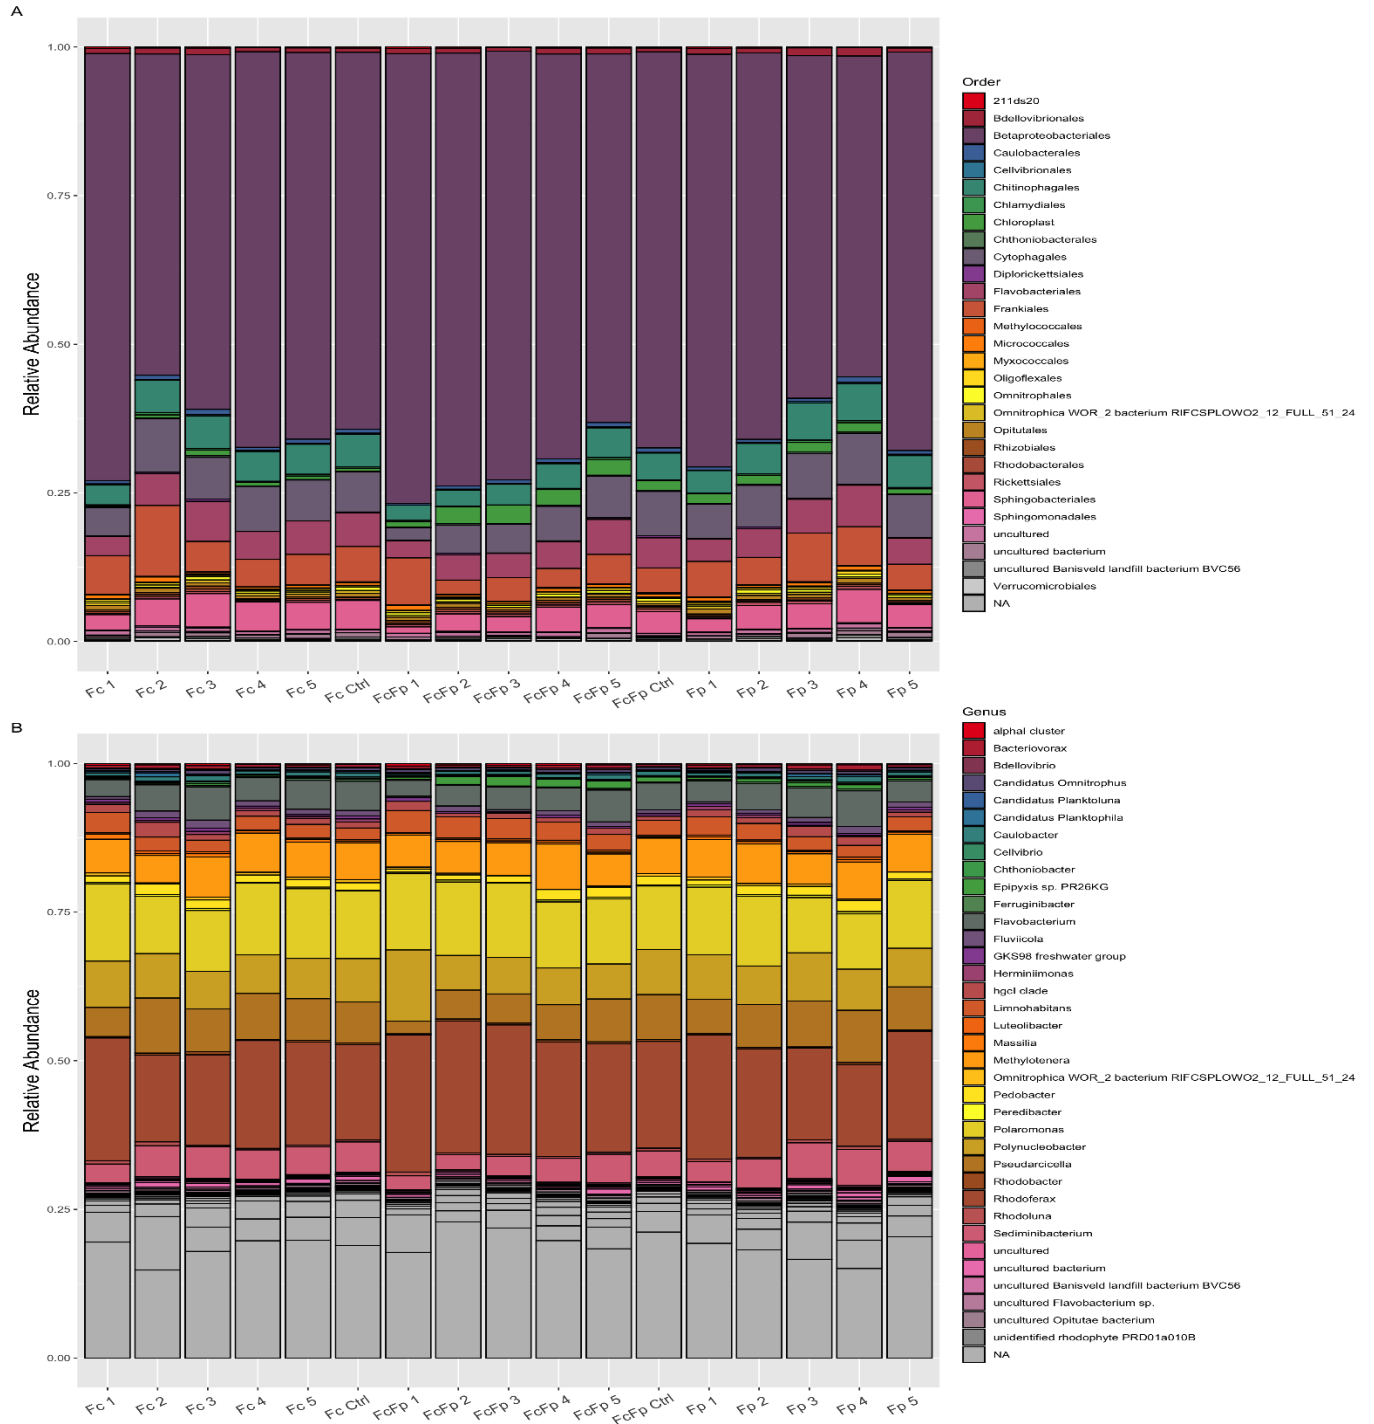

657

658 **Supplementary Figure 3: Order and Genus Level Taxonomic Barplots of Water**

659 **Samples with Spiked Flavobacteria Removed. (A) Order level taxonomic breakdown**

660 **for each sample excluding reads from *F. columnare* and *F. psychrophilum*. (B) Genus**

661 level taxonomic breakdown for each sample excluding reads from *F. columnare* and *F.*  
662 *psychrophilum*. Labels on the x-axis correspond to the dilution series. Barplots are  
663 presented as relative abundances. The *Flavobacterium* inoculum level decreases from  
664 left to right with each series. Fc – *F. columnare* only, FcFp – Co-inoculation, Fp – *F.*  
665 *psychrophilum* only, NA – No assignment could be made at this taxonomic level.

666

667

668

669

670 **Supplementary Table 1: Calculated *F. columnare* and**  
 671 ***F. psychrophilum* Cell Counts for QIIME 2 and ddPCR.**

|           | Qiime2 Calculated Fc Cells | ddPCR Calculated Fc Cells <sup>a</sup> | Qiime2 Calculated Fp Cells | ddPCR Calculated Fp Cells <sup>a</sup> |
|-----------|----------------------------|----------------------------------------|----------------------------|----------------------------------------|
| Fc Ctrl   | 0                          | 1                                      | 0                          | 1067                                   |
| Fc 5      | 0                          | 1122                                   | 0                          | 0                                      |
| Fc 4      | 12514                      | 20022                                  | 0                          | 0                                      |
| Fc 3      | 137322                     | 97622                                  | 0                          | 2267                                   |
| Fc 2      | 2238792                    | 1460622                                | 0                          | 0                                      |
| Fc 1      | 17000414                   | 30499622                               | 3747                       | 8667                                   |
| FcFp Ctrl | 0                          | 0                                      | 0                          | 3267                                   |
| FcFp 5    | 0                          | 2622                                   | 3833                       | 2667                                   |
| FcFp 4    | 22552                      | 23822                                  | 14408                      | 15967                                  |
| FcFp 3    | 124104                     | 180622                                 | 102359                     | 143667                                 |
| FcFp 2    | 1675120                    | 1825622                                | 1067381                    | 1276667                                |
| FcFp 1    | 8784734                    | 27799622                               | 2608850                    | 13637667                               |
| Fp 5      | 0                          | 422                                    | 6975                       | 4067                                   |
| Fp 4      | 0                          | 0                                      | 22616                      | 23067                                  |
| Fp 3      | 0                          | 0                                      | 136545                     | 135667                                 |
| Fp 2      | 0                          | 0                                      | 2458902                    | 2204667                                |
| Fp 1      | 0                          | 442                                    | 14397209                   | 26887667                               |

672

673

a. Cell counts shown for ddPCR are baseline adjusted

674 **Supplementary Table 2: Primer and Probe Sequences**

675 **Used for ddPCR and qPCR.**

|            | Type           | Application | Target                  | Sequence (5'-3')                           | Reference             |
|------------|----------------|-------------|-------------------------|--------------------------------------------|-----------------------|
| AtpA_779F  | Forward Primer | ddPCR       | <i>Flavobacterium</i>   | CCA CCA GGA CGT GAR GC                     | this paper            |
| AtpA_978R  | Reverse Primer | ddPCR       | <i>Flavobacterium</i>   | GCA GAA ACG TCA CCC GC                     | this paper            |
| AtpA_Fc91P | Probe          | ddPCR       | <i>F. columnare</i>     | [HEX] AAG CCG TTA ATG ACC CTC CCC C [BHQ1] | this paper            |
| AtpA_Fp61P | Probe          | ddPCR       | <i>F. psychrophilum</i> | [FAM] AAT GAA CCA CCA CCT TTT ACG A [BHQ1] | this paper            |
| 27F        | Forward Primer | qPCR        | Eubacteria              | AGA GTT TGA TCM TGG CTC AG                 | Goffredo et al., 2016 |
| 519R       | Reverse Primer | qPCR        | Eubacteria              | GWA TTA CCG CGG CKG CTG                    | Goffredo et al., 2016 |

676

677

678

679

680

681

682

683

684

685

686

687

688

689

690

691

692

693

694

695

- 696 1. Stentiford GD, Sritunyalucksana K, Flegel TW, Williams BAP, Withyachumnarnkul  
697 B, Itsathitphaisarn O, Bass D. 2017. New Paradigms to Help Solve the Global  
698 Aquaculture Disease Crisis. *PLOS Pathogens* 13:e1006160.
- 699 2. Pridgeon JW, Klesius PH. 2012. Major bacterial diseases in aquaculture and their  
700 vaccine development. *CAB Reviews* <https://doi.org/10.1079/PAVSNNR20127048>.
- 701 3. Cai W, De La Fuente L, Arias CR. 2013. Biofilm formation by the fish pathogen  
702 flavobacterium columnare: Development and parameters affecting surface  
703 attachment. *Applied and Environmental Microbiology* 79:5633–5642.
- 704 4. Ríos-Castillo AG, Thompson KD, Adams A, Marín de Mateo M, Rodríguez-Jerez  
705 JJ. 2018. Biofilm formation of *Flavobacterium psychrophilum* on various  
706 substrates. *Aquaculture Research* 49:3830–3837.
- 707 5. Tekedar HC, Karsi A, Reddy JS, Nho SW, Kalindamar S, Lawrence ML. 2017.  
708 Comparative genomics and transcriptional analysis of *Flavobacterium columnare*  
709 strain ATCC 49512. *Frontiers in Microbiology* 8.
- 710 6. Cai W, De La Fuente L, Arias CR. 2013. Biofilm formation by the fish pathogen  
711 *Flavobacterium columnare*: development and parameters affecting surface  
712 attachment. *Applied and environmental microbiology* 79:5633–42.
- 713 7. NASS. 2019. Trout Production.
- 714 8. Sundell K, Wiklund T. 2011. Effect of biofilm formation on antimicrobial tolerance  
715 of *Flavobacterium psychrophilum*. *Journal of Fish Diseases* 34:373–383.
- 716 9. LaFrentz BR, García JC, Waldbieser GC, Evenhuis JP, Loch TP, Liles MR, Wong  
717 FS, Chang SF. 2018. Identification of Four Distinct Phylogenetic Groups in  
718 *Flavobacterium columnare* With Fish Host Associations. *Frontiers in Microbiology*  
719 9.
- 720 10. Hoare R, Ngo TPH, Bartie KL, Adams A. 2017. Efficacy of a polyvalent immersion  
721 vaccine against *Flavobacterium psychrophilum* and evaluation of immune  
722 response to vaccination in rainbow trout fry (*Onchorynchus mykiss* L.). *Veterinary*  
723 *Research* 48.
- 724 11. Gómez E, Méndez J, Cascales D, Guijarro JA. 2014. *Flavobacterium*  
725 *psychrophilum* vaccine development: A difficult task. *Microbial Biotechnology*  
726 7:414–423.
- 727 12. Loch TP, Faisal M. 2015. Emerging flavobacterial infections in fish: A review.  
728 *Journal of Advanced Research*. Elsevier.
- 729 13. Austin B, Austin DA. 2007. Isolation/Detection, p. 151–183. *In* *Bacterial Fish*  
730 *Pathogens*. Springer Netherlands.
- 731 14. Crump EM, Perry MB, Clouthier SC, Kay WW. 2001. Antigenic characterization of  
732 the fish pathogen *Flavobacterium psychrophilum*. *Applied and Environmental*  
733 *Microbiology* 67:750–759.
- 734 15. Schrader C, Schielke A, Ellerbroek L, Johne R. 2012. PCR inhibitors -  
735 occurrence, properties and removal. *Journal of Applied Microbiology* 113:1014–  
736 1026.
- 737 16. Wiklund T, Madsen L, Bruun MS, Dalsgaard I. 2000. Detection of *Flavobacterium*  
738 *psychrophilum* from fish tissue and water samples by PCR amplification. *Journal*  
739 *of Applied Microbiology* 88:299–307.
- 740 17. Bas S, Kramer M, Stopar D. 2017. Biofilm Surface Density Determines Biocide  
741 Effectiveness. *Frontiers in Microbiology* 8.

- 742 18. Rantsiou K, Kathariou S, Winkler A, Skandamis P, Saint-Cyr MJ, Rouzeau-  
743 Szynalski K, Amézquita A. 2018. Next generation microbiological risk  
744 assessment: opportunities of whole genome sequencing (WGS) for foodborne  
745 pathogen surveillance, source tracking and risk assessment. *International Journal*  
746 *of Food Microbiology* 287:3–9.
- 747 19. Hoffmann C, Stockhausen M, Merkel K, Calvignac-Spencer S, Leendertz FH.  
748 2016. Assessing the feasibility of fly based surveillance of wildlife infectious  
749 diseases. *Scientific Reports* 6.
- 750 20. Nkili-Meyong AA, Bigarré L, Labouba I, Vallaëys T, Avarre JC, Berthet N. 2017.  
751 Contribution of Next-Generation Sequencing to Aquatic and Fish Virology.  
752 *Intervirology*. S. Karger AG.
- 753 21. Kim Y, Aw TG, Teal TK, Rose JB. 2015. Metagenomic Investigation of Viral  
754 Communities in Ballast Water. *Environmental Science and Technology* 49:8396–  
755 8407.
- 756 22. Nelson MC, Morrison HG, Benjamino J, Grim SL, Graf J. 2014. Analysis,  
757 Optimization and Verification of Illumina-Generated 16S rRNA Gene Amplicon  
758 Surveys. *PLoS ONE* 9:e94249.
- 759 23. Bolyen E, Rideout JR, Dillon MR, Bokulich NA, Abnet CC, Al-Ghalith GA,  
760 Alexander H, Alm EJ, Arumugam M, Asnicar F, Bai Y, Bisanz JE, Bittinger K,  
761 Brejnrod A, Brislawn CJ, Brown CT, Callahan BJ, Caraballo-Rodríguez AM,  
762 Chase J, Cope EK, Da Silva R, Diener C, Dorrestein PC, Douglas GM, Durall DM,  
763 Duvall C, Edwards CF, Ernst M, Estaki M, Fouquier J, Gauglitz JM, Gibbons  
764 SM, Gibson DL, Gonzalez A, Gorlick K, Guo J, Hillmann B, Holmes S, Holste H,  
765 Huttenhower C, Huttley GA, Janssen S, Jarmusch AK, Jiang L, Kaehler BD, Kang  
766 K Bin, Keefe CR, Keim P, Kelley ST, Knights D, Koester I, Kosciolk T, Kreps J,  
767 Langille MGI, Lee J, Ley R, Liu Y-X, Lofffield E, Lozupone C, Maher M, Marotz C,  
768 Martin BD, McDonald D, McIver LJ, Melnik A V., Metcalf JL, Morgan SC, Morton  
769 JT, Naimey AT, Navas-Molina JA, Nothias LF, Orchanian SB, Pearson T, Peoples  
770 SL, Petras D, Preuss ML, Priesse E, Rasmussen LB, Rivers A, Robeson MS,  
771 Rosenthal P, Segata N, Shaffer M, Shiffer A, Sinha R, Song SJ, Spear JR,  
772 Swafford AD, Thompson LR, Torres PJ, Trinh P, Tripathi A, Turnbaugh PJ, Ul-  
773 Hasan S, van der Hooft JJJ, Vargas F, Vázquez-Baeza Y, Vogtmann E, von  
774 Hippel M, Walters W, Wan Y, Wang M, Warren J, Weber KC, Williamson CHD,  
775 Willis AD, Xu ZZ, Zaneveld JR, Zhang Y, Zhu Q, Knight R, Caporaso JG. 2019.  
776 Reproducible, interactive, scalable and extensible microbiome data science using  
777 QIIME 2. *Nature Biotechnology* 1.
- 778 24. Callahan BJ, McMurdie PJ, Rosen MJ, Han AW, Johnson AJA, Holmes SP. 2016.  
779 DADA2: High-resolution sample inference from Illumina amplicon data. *Nature*  
780 *Methods* 13:581–583.
- 781 25. Miotke L, Lau BT, Rumma RT, Ji HP. 2014. High sensitivity detection and  
782 quantitation of DNA copy number and single nucleotide variants with single color  
783 droplet digital PCR. *Analytical Chemistry* 86:2618–2624.
- 784 26. Tang H, Cai Q, Li H, Hu & P. 2016. Bioscience, Biotechnology, and Biochemistry  
785 Comparison of droplet digital PCR to real-time PCR for quantification of hepatitis  
786 B virus DNA. *Bioscience, Biotechnology, and Biochemistry*  
787 <https://doi.org/10.1080/09168451.2016.1196576>.



- 788 27. Hindson CM, Chevillet JR, Briggs HA, Gallichotte EN, Ruf IK, Hindson BJ,  
789 Vessella RL, Tewari M. 2013. Absolute quantification by droplet digital PCR  
790 versus analog real-time PCR. *Nature Methods* 10:1003–1005.
- 791 28. Stoddard SF, Smith BJ, Hein R, Roller BRK, Schmidt TM. 2015. rrnDB: Improved  
792 tools for interpreting rRNA gene abundance in bacteria and archaea and a new  
793 foundation for future development. *Nucleic Acids Research*  
794 <https://doi.org/10.1093/nar/gku1201>.
- 795 29. Yang B, Wang Y, Qian PY. 2016. Sensitivity and correlation of hypervariable  
796 regions in 16S rRNA genes in phylogenetic analysis. *BMC Bioinformatics* 17:135.
- 797 30. Brandt J, Albertsen M. 2018. Investigation of detection limits and the influence of  
798 DNA extraction and primer choice on the observed microbial communities in  
799 drinking water samples using 16S rRNA gene amplicon sequencing. *Frontiers in*  
800 *Microbiology* 9.
- 801 31. Garcia C, Pozet F, Michel C. 2000. Standardization of experimental infection with  
802 *Flavobacterium psychrophilum*, the agent of rainbow trout *Oncorhynchus mykiss*  
803 fry syndrome. *Diseases of Aquatic Organisms* 42:191–197.
- 804 32. Kinnula H, Mappes J, Valkonen JK, Sundberg LR, Yu XJ. 2015. The influence of  
805 infective dose on the virulence of a generalist pathogen in Rainbow Trout  
806 (*Oncorhynchus mykiss*) and Zebra Fish (*Danio rerio*). *PLoS ONE* 10.
- 807 33. Auer L, Mariadassou M, O'Donohue M, Klopp C, Hernandez-Raquet G. 2017.  
808 Analysis of large 16S rRNA Illumina data sets: Impact of singleton read filtering on  
809 microbial community description. *Molecular Ecology Resources* 17:e122–e132.
- 810 34. Gu W, Miller S, Chiu CY. 2019. Clinical Metagenomic Next-Generation  
811 Sequencing for Pathogen Detection. *Annual Review of Pathology: Mechanisms of*  
812 *Disease* 14:319–338.
- 813 35. Schlager R, Chiu CY, Miller S, Procop GW, Weinstock G. 2017. Validation of  
814 metagenomic next-generation sequencing tests for universal pathogen detection.  
815 *Archives of Pathology and Laboratory Medicine* 141:776–786.
- 816 36. Pereira RPA, Peplies J, Brettar I, Höfle MG. 2017. Development of a genus-  
817 specific next generation sequencing approach for sensitive and quantitative  
818 determination of the *Legionella* microbiome in freshwater systems. *BMC*  
819 *Microbiology* 17:79.
- 820 37. Hillmann B, Al-Ghalith GA, Shields-Cutler RR, Zhu Q, Gohl DM, Beckman KB,  
821 Knight R, Knights D. 2018. Evaluating the Information Content of Shallow  
822 Shotgun Metagenomics. *mSystems* 3.
- 823 38. Bernardet J-F, Nakagawa Y. 2006. An Introduction to the Family  
824 *Flavobacteriaceae*, p. 455–480. *In* *The Prokaryotes*. Springer New York.
- 825 39. Cole JR, Wang Q, Fish JA, Chai B, McGarrell DM, Sun Y, Brown CT, Porras-  
826 Alfaro A, Kuske CR, Tiedje JM. 2014. Ribosomal Database Project: Data and  
827 tools for high throughput rRNA analysis. *Nucleic Acids Research* 42.
- 828 40. Price MN, Dehal PS, Arkin AP. 2009. Fasttree: Computing large minimum  
829 evolution trees with profiles instead of a distance matrix. *Molecular Biology and*  
830 *Evolution* 26:1641–1650.
- 831 41. Price MN, Dehal PS, Arkin AP. 2010. FastTree 2 - Approximately maximum-  
832 likelihood trees for large alignments. *PLoS ONE* 5:e9490.

- 833 42. Letunic I, Bork P. 2021. Interactive Tree Of Life (iTOL) v5: an online tool for  
834 phylogenetic tree display and annotation. *Nucleic Acids Research*  
835 <https://doi.org/10.1093/nar/gkab301>.
- 836 43. Anacker RL, Ordal EJ. 1959. STUDIES ON THE MYXOBACTERIUM  
837 CHONDROCOCCUS COLUMNARIS. *Journal of Bacteriology* 78.
- 838 44. LaFrentz BR, Klesius PH. 2009. Development of a culture independent method to  
839 characterize the chemotactic response of *Flavobacterium columnare* to fish  
840 mucus. *Journal of Microbiological Methods* 77:37–40.
- 841 45. Benjamino J, Beka L, Graf J. 2018. Microbiome Analyses for Toxicological  
842 Studies. *Current Protocols in Toxicology* 77:e53.
- 843 46. Bokulich NA, Kaehler BD, Rideout JR, Dillon M, Bolyen E, Knight R, Huttley GA,  
844 Gregory Caporaso J. 2018. Optimizing taxonomic classification of marker-gene  
845 amplicon sequences with QIIME 2's q2-feature-classifier plugin. *Microbiome* 6:1–  
846 17.
- 847 47. Goffredo M, Mass K, Parks EJ, Wagner DA, McClure EA, Graf J, Savoye M,  
848 Pierpont B, Cline G, Santoro N. 2016. Role of gut microbiota and short chain fatty  
849 acids in modulating energy harvest and fat partitioning in youth. *Journal of Clinical*  
850 *Endocrinology and Metabolism* 101:4367–4376.
- 851 48. TURNER S, PRYER KM, MIAO VPW, PALMER JD. 1999. Investigating Deep  
852 Phylogenetic Relationships among Cyanobacteria and Plastids by Small Subunit  
853 rRNA Sequence Analysis. *The Journal of Eukaryotic Microbiology* 46:327–338.
- 854 49. Weisburg WG, Barns SM, Pelletier DA, Lane DJ. 1991. 16S ribosomal DNA  
855 amplification for phylogenetic study. *Journal of Bacteriology* 173:697–703.
- 856 50. Stoddard SF, Smith BJ, Hein R, Roller BRK, Schmidt TM. 2015. rrnDB: Improved  
857 tools for interpreting rRNA gene abundance in bacteria and archaea and a new  
858 foundation for future development. *Nucleic Acids Research* 43:D593–D598.  
859
